# Supplementary material for: Optimizing Audit and Feedback in Low-Resource Settings: A Best-Worst Scaling Study of Healthcare Workers Preference in Zanzibar
Source: Research Square preprint supplement (doi:10.21203/rs.3.rs-6270141/v1), 2025-04-17

I**MPORTANCE RANK OF BWS SCORES BY GENDER**

The following is the importance of Best-worst scaling according to the gender of primary healthcare workers in Zanzibar


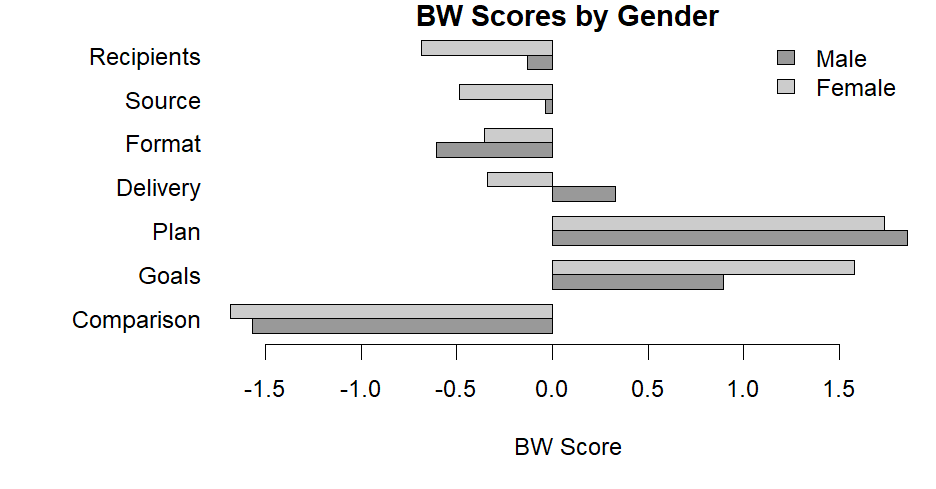

Supplement: Supplementary file 1 [file 4a54421f94fa7a1a9e4d4204.docx]
