# Supplementary material for: Optimizing Audit and Feedback in Low-Resource Settings: A Best-Worst Scaling Study of Healthcare Workers Preference in Zanzibar
Source: Research Square preprint supplement (doi:10.21203/rs.3.rs-6270141/v1), 2025-04-17
Supplement: Supplementary file 2 [file 6f8cd873ac3777b61e05cf3f.docx]

**Additional file 2: BIBD configuration**

The R software version 4.4.2 was used to realize BIBD for questionnaire development In designing the blocks, the following was considered;

1. bk = vr
2. r(k - 1) = λ(v – 1)
3. b >= v

Where,

v = Total number of treatments = 7 (Total number of A&F components)

b = Total no of blocks = 7 (Total number of set of questions)

k = Size of the block = 3 (Number of A&F components as an option in a single set of questions)

ri = Number of times a single treatment(i) is replicated = 3 (Number of times each A&F component is repeated as an option in a questionnaire)

λii' = In how many blocks i and i' are repeated/co-occurred together), for balanced design λii' = λ for all pairs = 1 (No of times two A&F components occur together as an option to choose in a questionnaire)

The following was therefore used in R software to develop the blocks;

#install.packages("foreign")

library(foreign)

require(foreign)

###BWS for medical students####

# I. BWS questionnaire designed by BIBD

library(crossdes) ## Loading BIBD-designed packages

## First, set the number of seeds to generate the BIBD design matrix

set.seed(1)

design<-find.BIB(trt=7,b=7,k=3)

isGYD(design)

items<-c("Feedback with Peer comparison","Feedback with goals/targets","Feedback with improvement plan","Delivery Method of Feedback Report","Format of the Feedback Report","Source of Feedback","Feedback Recipients")

items<-c("Comparison","Goals","Plan","Delivery","Format","Source","Recipients")

## Generate a questionnaire

result<-bws.questionnaire(design,design.type=2,item.names = items)

print(bws.questionnaire)
